# Supplementary material
Source: MDPI journal article supplement (https://www.mdpi.com/2073-445X/10/8/768)
Supplement: s1 [file s1]

Archive with 5 entries (5 files):
- Korys_Supplementary_material_table S2.xlsx
- Korys_Supplementary_material_table_S1.xlsx
- Korys_Supplementary_material_table_S3.xlsx
- Korys_Supplementary_material_table_S4.xlsx
- Land_1273315_Korys_Supplementary_Material_Description.pdf
