# Supplementary material
Source: MDPI journal article supplement (https://www.mdpi.com/2073-445X/10/8/768)
Supplement: s1 [file s1 › Korys_Supplementary_material_table S2.xlsx]

## Sheet: Planilha1
identification	sample ID	pH (KCL)	pH (H2O)	N-total (g kg -1)	K (mg dm -3)	P (mg dm -3)	SMC soil moisture content (%)	Na (mg dm -3)	Ca (cmolc dm-3)	Mg (cmolc dm-3)	Al (cmolc dm-3)	H+Al (cmolc dm-3)	SB (cmolc dm-3)	t effective CEC (cmolc dm-3)	T potential CEC (cmolc dm-3)	V (%)	m (%)	SOM soil organic matter (dag kg-1)	P-Rem (mg/L)	Fe (mg dm-3)	Mn (mg dm-3)	Cu (mg dm-3)	soil classification	Clay (dag kg -1)	Silt (dag kg -1)	Sand (dag kg -1)
CONTROL*	P1	3.55	4.2	1.1	34.93	3.27	13.34	22.6	0.51	0.26	1.04	4.42	0.86	1.9	5.28	16.28	54.74	0.91	43.14	518.16	30.66	3.86	t1	13	9	78
CONTROL	P2	4.16	5.5	2.1	42.88	1.69	24.81	25.68	1.15	0.64	0.48	3.7	1.9	2.38	5.6	33.93	20.17	1.69	33.15	598.05	36.9	4.71	t2	24	18	58
CONTROL	P3	4.01	5.1	2.3	48.83	1.62	18.98	24.65	0.65	0.34	0.68	4.32	1.12	1.8	5.44	20.5	37.78	1.51	42.79	576.45	21.79	3.07	t2	18	12	70
CONTROL	P4	4.04	5.3	2.14	42.88	0.84	19.35	24.65	0.54	0.29	1.21	5.28	0.94	2.15	6.22	15.11	56.28	1.84	29.84	548.42	26.26	2.85	t2	30	19	51
CONTROL	P5	3.99	5.1	2.32	46.85	0.81	35.25	28.75	0.97	0.53	0.81	4.78	1.62	2.43	6.4	25.31	33.33	2.15	27.36	572.27	33.84	4.64	t2	33	29	38
CONTROL	P6	4.29	5.5	2.14	256.42	0.49	32.52	25.68	1.03	0.59	0.33	3.58	2.28	2.61	5.86	38.86	12.64	1.68	29.49	355.74	26.38	5.41	t3	36	28	36
CONTROL	P7	4.4	5.5	2.48	37.91	1.65	34.51	24.65	2.28	0.96	0.26	5.52	3.34	3.6	8.86	37.67	7.22	2.86	22.42	209.68	30.24	2.29	t2	34	30	36
CONTROL	P8	4.03	5.3	2.2	29.96	0.49	33.38	24.65	0.92	0.36	0.95	5.52	1.36	2.31	6.88	19.72	41.13	1.89	23.61	610.22	35.86	4.04	t2	35	28	37
CONTROL	P9	3.98	5.5	2.06	25.99	0.36	28.71	28.75	0.7	0.17	0.84	4.62	0.94	1.78	5.56	16.85	47.19	1.67	26.9	330.1	24.01	2.2	t2	33	21	46
CONTROL	P10	4.21	5.4	1.94	48.83	0.08	31.7	25.68	0.76	0.32	0.73	3.7	1.21	1.94	4.91	24.55	37.63	1.55	27.06	335.73	23.99	0.67	t2	34	18	48
mean		NA	5.35	2.07	61.54	1.13	27.25	25.57	0.95	0.45	0.73	4.52	NA	2.29	6.101	24.87	34.81	1.77	NA	465.48	28.99	3.37	NA	29	21.2	49.8
sd		NA	0.39	0.37	68913	0.94	7.70451	1.89	0.51	0.23	0.3	0.739958	NA	0.54	1.12811	8.95	16.8	0.49	NA	143.19	5.03	1.43157	NA	7.95	7.37	14.8
* CONTROL= reference system (degraded pasture)
