# Supplementary material
Source: MDPI journal article supplement (https://www.mdpi.com/2073-445X/10/8/768)
Supplement: s1 [file s1 › Korys_Supplementary_material_table_S1.xlsx]

## Sheet: Planilha1
identification	sample ID	pH(KCl)	pH	N-total (g kg -1)	K (mg dm -3)	P (mg dm -3)	SMC soil moisture content (%)	Na (mg dm -3)	Ca (cmolc dm-3)	Mg (cmolc dm-3)	Al (cmolc dm-3)	H+Al (cmolc dm-3)	SB	t ( effective CEC)	Cation exchange capacity (CEC) cmolc kg-1	V (%)	m (%)	SOM soil organic matter (dag kg-1)	P-Rem (mg/L)	Fe (mg dm-3)	Mn (mg dm-3)	Cu (mg dm-3)	soil classification	Clay (dag kg -1)	Silt (dag kg -1)	Sand (dag kg -1)
P1_active slope	B1P1	4.47	5.7	2.16	106,5	2.71	2.05	21.62	1.36	0.57	0.23	3.02	2.2	2.43	5.22	42.2	9.47	1.87	38.31	27.53	176.53	1.9	t2	23	13	64
P1_active slope	B1P2	4.62	5.8	3.22	128,2	3.33	2.01	20.58	1.88	0.88	0.13	3.13	3.09	3.22	6.22	49.66	4.04	2.44	45.59	58.31	193.49	1.22	t2	19	11	70
P1_active slope	B1P3	4.41	5.5	2.2	90,71	3.21	2.38	21.62	1.2	0.57	0.28	3.13	2	2.28	5.13	39.04	12.28	2.27	41.82	37.2	151.87	1.81	t2	23	11	66
P1_active slope	B1P4	4.41	5.8	2.88	104,52	3.75	2.17	20.58	1.76	0.78	0.2	3.82	2.81	3.01	6.63	42.35	6.64	2.52	43.23	27.63	129.24	1.43	t2	19	10	71
P1_active slope	B1P5	4.27	5.4	2.04	91,7	3.97	2.02	21.62	1.19	0.6	0.35	3.58	2.03	2.38	5.61	36.1	14.71	2.09	47.97	76.79	176.14	1.88	t2	21	12	67
P1_active slope	B1P6	4.53	5.8	2.38	92.68	2.55	2.08	14.37	1.32	0.6	0.13	2.68	2.16	2.29	4.84	44.58	5.68	1.92	41.48	24.93	198.7	1.71	t2	23	14	63
P1_active slope	B1P7	4.34	5.3	2.66	129.19	4.2	2.16	21.62	1.63	0.92	0.25	3.58	2.88	3.13	6.46	44.6	7.99	2.26	46.1	67.33	152.28	1.47	t2	19	13	68
P1_active slope	B1P8	4.1	5.6	2.66	103.54	3.24	1.71	17.48	1.21	0.61	0.31	3.58	2.09	2.4	5.67	36.78	12.92	1.97	43.23	82.24	154.05	1.66	t2	21	11	68
P1_active slope	B1P9	4.38	5.4	4.9	74.92	3.18	1.99	20.58	1.16	0.58	0.3	2.9	1.93	2.23	4.83	40	13.45	1.9	43.96	60.11	199.42	1.51	t2	23	13	64
P1_active slope	B2P1	4.42	5.4	2.02	189.38	4.49	1.8	21.62	1.56	1.05	0.23	2.8	3.1	3.33	5.9	52.47	6.91	1.83	47.02	107.78	86.45	1.04	t2	21	11	68
P1_active slope	B2P2	4.09	6.2	2.26	141.03	2.86	1.72	22.66	1.26	0.78	0.59	3.42	2.4	2.99	5.82	41.26	19.73	1.56	45.46	102.61	125.31	1.94	t2	19	11	70
P1_active slope	B2P3	4.19	5.4	2.1	111.43	3.33	2.34	21.62	1.7	0.88	0.41	3.87	2.87	3.28	6.74	42.52	12.5	2.13	45.71	88.29	102.92	1.44	t2	19	15	66
P1_active slope	B2P4	4.47	5.4	2.3	104.52	3.21	2.06	21.62	2.05	0.89	0.18	3.1	3.21	3.39	6.31	50.84	5.31	1.96	46.1	70.73	148.8	1.74	t2	24	14	62
P1_active slope	B2P5	4.22	5.3	2.36	110.44	3.08	2.09	20.58	1.7	0.83	0.33	3.54	2.81	3.14	6.35	44.3	10.51	1.76	44.45	73.24	87.61	1.55	t2	22	14	64
P1_active slope	B2P6	4.34	5.4	2.18	171.62	3.14	2.21	20.58	1.77	1.1	0.24	2.93	3.31	3.55	6.24	53.05	6.67	1.94	46.1	86.98	124.22	2.26	t2	19	12	69
P1_active slope	B2P7	4.13	5	2.34	93.67	4.3	2.48	20.58	2.27	1.04	0.26	2.96	3.55	3.81	6.51	54.53	6.82	1.73	47.16	78.13	65.02	1.56	t2	19	14	67
P1_active slope	B2P8	4.11	5.1	2.22	112.42	3.11	2.28	21.62	2.02	0.81	0.25	3.17	3.12	3.37	6.29	49.57	7.42	1.67	46.1	100.31	77.06	1.8	t2	22	13	65
P1_active slope	B2P9	4.79	5.8	2.36	132.15	2.49	1.94	15.41	2.2	0.9	0.1	2.29	3.44	3.54	5.73	60.01	2.82	1.84	48.11	52.21	126.46	1.59	t2	23	14	63
P1_active slope	B3P1	4.32	5.2	2.12	105.51	3.08	1.77	20.58	1.82	0.76	0.25	2.83	2.85	3.1	5.68	50.19	8.06	1.67	49.94	96.57	142.03	2.36	t2	17	11	72
P1_active slope	B3P2	4.56	6	1.54	142.02	12.73	1.36	20.58	2.15	0.87	0.12	2.27	3.38	3.5	5.65	59.9	3.43	1.28	49.8	107.48	107.43	2.17	t2	23	7	70
P1_active slope	B3P3	4.7	5.8	2.08	113.4	3.11	1.7	21.62	2.44	0.86	0.09	2.15	3.59	3.68	5.74	62.56	2.45	1.47	48.52	79.8	121.79	1.6	t2	19	11	70
P1_active slope	B3P4	5.12	5.6	2.48	238.71	6.79	2.04	22.66	3.5	1.6	0.04	2.17	5.71	5.75	7.88	72.49	0.7	1.77	51.57	66.94	103.07	1.54	t2	18	12	70
P1_active slope	B3P5	4.78	5.7	2.02	156.82	11.52	1.52	21.62	2.6	0.99	0.13	2.15	3.99	4.12	6.14	65.02	3.16	1.59	50.38	77.89	117.8	2.16	t2	15	12	73
P1_active slope	B3P6	4.4	5.4	2.3	127.22	3.18	1.72	20.58	1.77	0.84	0.12	2.48	2.94	3.06	5.42	54.17	3.92	1.47	50.38	99.98	125.6	1.34	t2	17	12	71
P1_active slope	B3P7	4.61	5.7	2.04	110.44	3.02	1.95	20.58	2.22	0.94	0.08	2.03	3.44	3.52	5.47	62.95	2.27	1.5	45.46	65.06	88.29	2.14	t2	19	8	73
P1_active slope	B3P8	4.47	5.4	2.1	115.38	2.89	2.11	20.58	2.46	0.98	0.11	3.1	3.74	3.85	6.84	54.62	2.86	1.62	46.49	56.32	95.68	3.46	t2	17	15	68
P1_active slope	B3P9	4.66	5.9	2.1	165.7	3.27	1.88	22.66	2.66	1.09	0.08	1.96	4.17	4.25	6.13	68.11	1.88	1.36	48.11	107.68	142.2	1.47	t2	17	16	67
mean		4.41	5.5	2.22	114.39	3.21	2.02	20.58	1.77	0.87	0.23	2.96	3.09	3.28	5.9	50.19	6.67	1.83	46.1	76.79	125.6	1.66	***	19	12	68
SD		0.242397	0.281935	0.595995	37.1218	2.47313	0.261561	1.94665	0.556031	0.218547	0.121761	0.569579	0.813902	0.745637	0.663791	9.93917	4.6823	0.315216	3.03413	24.867	37.1943	0.46696	***	2.44133	2.04438	3.14511
P2_active slope	B4P1	4.43	5.3	2.24	119.32	2.74	2.53	14.37	1	0.74	0.16	2.69	2.05	2.21	5.01	40.84	7.24	2.23	43.47	25.44	128.22	1.36	t2	23	10	67
P2_active slope	B4P2	4.21	5.9	2.24	107.48	2.4	2.22	15.41	1.14	0.65	0.13	2.9	2.07	2.2	4.97	41.56	5.91	1.88	40.02	36.87	222.75	1.94	t2	25	11	64
P2_active slope	B4P3	4.35	5.5	2.4	109.46	2.34	2.01	14.37	1.17	0.7	0.2	3.06	2.15	2.35	5.21	41.28	8.51	1.92	44.58	24.73	71.84	1.14	t2	23	13	64
P2_active slope	B4P4	4.3	5.3	2.14	84.79	2.37	1.95	14.37	1.09	0.7	0.19	2.74	2.01	2.2	4.75	42.26	8.64	1.86	43.96	20.22	185.57	1.42	t2	21	12	67
P2_active slope	B4P5	4.42	5.4	2.16	89.72	2.43	2.07	12.3	1.16	0.75	0.13	3.1	2.14	2.27	5.24	40.84	5.73	1.73	47.29	33.07	195.32	1.83	t2	21	8	71
P2_active slope	B4P6	4.41	5.6	2.24	114.39	2.13	2.15	12.3	1.25	0.8	1.11	2.71	2.34	2.45	5.05	46.4	4.49	1.86	41.59	27.28	174.88	1.69	t2	24	13	63
P2_active slope	B4P7	4.29	6	2.3	122.28	2.37	1.7	10.23	1.08	0.76	0.08	2.4	2.15	2.23	4.55	47.33	3.59	2.04	45.59	18.09	168.62	1.64	t2	23	6	71
P2_active slope	B4P8	4.4	5.4	2.26	87.75	2.52	1.89	15.41	1.53	0.78	0.12	3	2.54	2.66	5.54	45.76	4.51	2.03	47.42	30.29	214.98	1.82	t2	24	11	65
P2_active slope	B4P9	4.23	5.6	2.08	115.38	2.07	2.06	14.37	1.49	0.84	0.17	3.1	2.63	2.8	5.73	45.83	6.07	1.91	42.4	27.06	76.94	1.3	t2	26	10	64
P2_active slope	B5P1	4.45	5.5	2.24	51.24	2.22	2.5	16.44	1.12	0.53	0.18	2.93	1.78	1.96	4.71	37.82	9.18	1.68	42.29	37.37	162.89	1.37	t2	22	12	66
P2_active slope	B5P2	4.61	5.8	2.4	32.5	2.04	2.79	13.34	0.69	0.38	0.48	3.66	1.15	1.63	4.81	23.98	29.45	1.32	40.8	28.17	85.11	1.3	t2	21	8	71
P2_active slope	B5P3	4.36	5.2	2.24	47.3	2.4	2.76	11.26	0.77	0.43	0.3	3.2	1.32	1.62	4.52	29.23	18.52	1.59	42.64	33.26	115.21	0.93	t2	21	11	68
P2_active slope	B5P4	4.42	5.5	2.04	71.96	2.22	2.48	9.19	0.74	0.51	0.3	3.13	1.43	1.73	4.56	31.46	17.34	1.52	44.95	26.16	79.7	1.21	t2	21	11	68
P2_active slope	B5P5	4.31	5.5	2.2	49.27	1.98	2.13	14.37	1.09	0.56	0.21	2.74	1.78	1.99	4.52	39.3	10.55	1.77	41.71	27.1	167.96	1.69	t2	21	14	65
P2_active slope	B5P6	4.63	5.5	2.16	52.23	2.25	2.16	19.55	1.36	0.64	0.38	2.96	2.13	2.51	5.09	41.92	15.14	1.79	39.05	25.18	146.96	1.35	t2	25	10	65
P2_active slope	B5P7	4.91	5.5	2.54	80.84	2.37	2.1	11.26	0.74	0.5	0.31	2.86	1.45	1.76	4.31	33.58	17.61	1.79	44.08	40.82	161.65	1.64	t2	22	11	67
P2_active slope	B5P8	4.59	5.3	2.38	93.67	2.83	2.28	11.26	0.69	0.49	0.33	2.8	1.42	1.75	4.22	33.65	18.86	1.68	45.46	40.94	179.46	1.71	t2	21	8	71
P2_active slope	B5P9	4.33	5.3	2.26	66.04	2.89	2.42	8.16	0.56	0.41	0.44	3.1	1.14	1.58	4.24	26.87	27.85	1.48	46.89	50.2	139.4	1.41	t2	23	12	65
P2_active slope	B6P1	4.41	5.6	2.58	20.66	1.56	2.08	11.26	0.93	0.55	0.18	3.17	1.53	1.71	4.7	32.62	10.53	1.9	39.37	17.4	97.09	1.08	t3	37	8	64
P2_active slope	B6P2	4.21	5.4	2.5	17.7	1.47	2.08	11.26	1.1	0.47	0.2	3.66	1.62	1.82	5.28	30.59	10.99	1.84	37.08	26.44	116.06	1.33	t3	42	11	47
P2_active slope	B6P3	4.57	5.8	2.88	66.04	2.07	2.55	11.26	1.14	0.67	0.11	2.71	1.98	2.09	4.69	42.2	5.26	1.69	42.87	29.86	246.56	1.94	t2	30	8	62
P2_active slope	B6P4	4.27	5.4	2.44	48.28	2.19	4.12	9.19	0.79	0.46	0.34	3.42	1.37	1.71	4.79	28.68	19.88	1.76	40.91	17.01	89.52	1.49	t2	28	11	61
P2_active slope	B6P5	4.59	5.8	2.46	41.38	2.1	1.55	9.19	0.86	0.5	0.13	2.62	1.47	1.6	4.09	35.85	8.12	1.4	43.96	28.07	234.73	2.05	t2	29	8	63
P2_active slope	B6P6	4.44	5.5	2.24	32.5	1.89	1.65	5.05	0.62	0.44	0.16	2.86	1.14	1.3	4	28.58	12.31	1.42	43.96	30.81	186.61	1.74	t2	27	9	64
P2_active slope	B6P7	4.38	5.2	2.56	16.71	1.77	1.71	10.23	0.68	0.45	0.31	3.06	1.17	1.48	4.23	27.73	20.95	1.56	40.02	25	84.4	1.21	t3	40	7	53
P2_active slope	B6P8	4.24	5.3	2.16	16.71	1.53	1.21	5.05	0.4	0.34	0.33	0.37	0.78	1.11	4.05	19.33	29.73	1.19	44.58	21.53	101	1.1	t2	29	6	65
P2_active slope	B6P9	4.49	5.4	2.24	52.23	1.83	1.91	9.19	0.74	0.64	0.2	3.17	1.51	1.71	4.68	32.35	11.7	1.51	39.16	25.71	220.3	2.08	t2	23	9	68
mean		4.41	5.5	2.24	66.04	2.22	2.1	11.26	1	0.55	0.2	2.96	1.62	1.82	4.7	35.85	10.55	1.76	42.87	27.1	161.65	1.42		23	10	65
SD		0.15787	0.209395	0.184168	34.2076	0.36348	0.531946	3.29227	0.286108	0.143241	0.198596	0.582065	0.47451	0.414961	0.452039	7.53176	7.75588	0.238715	2.68968	7.67168	53.6357	0.315582		5.78558	2.14702	5.14657
P3_active_flat	B7P1	3.95	5.1	2.22	118.85	2.11	1.74	22.44	1.01	0.74	0.49	2.74	2.05	2.54	4.79	42.9	19.29	1.24	42.58	106.47	109.23	2.19	t2	19	11	70
P3_active_flat	B7P2	4.22	5.3	2.32	115.75	2.64	1.82	22.44	1.2	0.78	0.43	3.13	2.28	2.62	5.41	42.08	12.98	1.47	48.89	88.78	143.26	1.48	t2	17	16	67
P3_active_flat	B7P3	3.88	4.9	2.36	122.98	2.92	1.79	22.44	1.34	0.89	0.42	3.66	2.55	2.97	6.21	40.99	14.14	1.45	50.72	133.74	139.27	4.04	t2	21	14	65
P3_active_flat	B7P4	4.15	5.2	2.44	122.98	2.89	1.72	22.44	1.32	0.9	0.33	3.24	2.54	2.87	5.78	43.86	11.5	1.14	53.72	106.67	80.4	1.99	t2	19	13	68
P3_active_flat	B7P5	4.07	5	2.34	85.83	2.82	1.86	22.44	1.2	0.75	0.43	3.35	2.17	2.6	5.52	39.31	16.54	1.22	52.95	134.87	89.86	1.77	t2	21	12	67
P3_active_flat	B7P6	4.18	5.1	2.52	144.65	3.66	2.16	23.5	1.66	1.04	0.37	3.27	3.07	3.44	6.34	48.44	10.76	1.48	52.19	118.27	103.79	1.85	t2	19	13	68
P3_active_flat	B7P7	4.18	5.2	2.58	135.36	2.92	1.99	23.5	1.5	1	0.33	3.31	2.85	3.18	6.16	46.22	10.38	1.52	50.58	168.39	151.4	1.5	t2	21	20	59
P3_active_flat	B7P8	4.07	4.9	2.02	112.66	3.24	1.43	22.44	1.27	0.79	0.39	3.87	2.35	2.74	6.22	37.76	14.23	1.23	53.41	142.03	106.55	1.25	t2	17	16	67
P3_active_flat	B7P9	4.13	5.1	2.38	117.82	3.24	1.4	19.24	1.14	0.84	0.35	3	2.28	2.63	5.28	43.22	13.31	1.24	57.14	86.44	64.38	0.68	t1	13	10	77
P3_active_flat	B8P1	3.84	4.4	1.62	57.96	2.98	2.96	21.37	0.08	0.45	0.98	4.57	1.4	2.38	5.97	23.43	41.18	1.07	46.11	364.98	83.52	4.55	t2	30	22	48
P3_active_flat	B8P2	3.74	4.7	2.22	84.8	3.96	2.54	22.44	0.5	0.5	1.13	4.32	1.22	2.35	5.54	21.98	48.09	1.51	35.6	287.55	29.08	3.24	t2	28	24	48
P3_active_flat	B8P3	3.83	4.7	2.16	41.45	2.17	3.58	24.57	0.67	0.45	1.43	6.1	1.23	2.66	7.33	16.73	53.76	1.81	33.4	236.8	41.1	3.84	t2	32	30	38
P3_active_flat	B8P4	3.66	4.4	2.64	49.71	2.2	2.58	18.18	0.62	0.5	1.12	5.22	1.25	2.37	6.47	19.28	47.26	1.64	38.91	283.34	32.01	1.91	t2	30	17	53
P3_active_flat	B8P5	3.9	4.9	1.56	55.9	3.5	4.47	22.44	0.83	0.62	1.12	4.72	1.59	2.72	6.31	25.25	41.33	1.47	37.77	235.75	33.52	3.33	t2	22	17	61
P3_active_flat	B8P6	3.79	4.3	1.28	66.22	4.45	3.8	23.5	0.74	0.48	1.11	4.42	1.39	2.5	5.81	23.92	44.4	1.2	39.55	453.73	96.45	3.95	t2	22	21	57
P3_active_flat	B8P7	3.85	4.5	1.52	37.33	2.51	3	17.11	0.56	0.42	1.16	4.62	1.08	2.24	5.7	18.87	51.79	1.36	36.75	311.32	42.88	2.18	t2	24	15	61
P3_active_flat	B8P8	3.75	4.4	1.9	50.74	2.92	3.38	25.63	0.76	0.49	1.36	6.1	1.38	2.74	7.48	18.45	49.64	1.65	34.05	462.25	82.31	3.53	t2	30	25	45
P3_active_flat	B8P9	3.89	4.5	2.6	60.03	2.26	5.43	20.31	0.68	0.72	1.21	5.96	1.55	2.76	7.51	20.69	43.84	1.46	32.59	235.02	34.31	1.31	t2	34	20	46
P3_active_flat	B9P1	3.68	4.4	1.48	36.29	2.98	1.78	10.72	0.36	0.22	1.11	3.95	0.67	1.78	4.62	14.57	62.36	0.93	47.15	259.41	38.03	2.51	t2	23	14	63
P3_active_flat	B9P2	3.73	4.2	1.46	44.55	2.7	2.57	12.85	0.41	0.31	1.18	4.52	0.83	2.01	5.35	15.59	58.71	0.97	46.75	381.32	71.04	3.92	t2	23	20	57
P3_active_flat	B9P3	3.72	4.4	2.2	42.49	2.2	5.69	34.15	0.65	0.53	1.34	5.28	1.29	2.63	6.57	19.62	50.95	1.4	32.86	255.63	51.17	4.03	t2	29	33	38
P3_active_flat	B9P4	3.71	4.4	1.64	43.52	2.51	2.3	12.85	0.55	0.52	0.96	4.23	1.18	2.14	5.41	21.84	44.86	0.98	48.62	153.15	26.07	2.08	t2	23	17	60
P3_active_flat	B9P5	3.42	4.1	1.62	53.84	3.37	2.09	10.72	0.42	0.37	1.16	4.88	0.93	2.09	5.81	15.97	55.5	0.92	47.94	414.49	51.05	3.54	t2	24	20	56
P3_active_flat	B9P6	3.64	4.4	1.86	70.35	3.3	2.68	17.11	0.57	0.56	1.22	5.05	1.31	2.53	6.36	20.6	48.22	1.08	45.35	279.4	50.25	4.31	t2	26	21	53
P3_active_flat	B9P7	3.75	4.4	1.92	49.71	4.32	3.44	13.92	0.32	0.24	1.19	4.52	0.69	1.88	5.21	13.2	63.3	0.9	44.73	295.39	31.3	3.06	t2	26	17	57
P3_active_flat	B9P8	3.82	4.6	1.88	71.38	2.14	2.83	19.24	0.44	0.48	1.14	4.83	1.1	2.24	5.93	18.6	50.89	0.95	38.81	343.58	30.45	2.05	t2	29	18	53
P3_active_flat	B9P9	3.78	4.2	2.18	37.33	2.67	4.67	25.63	0.56	0.53	1.76	6.66	1.19	2.95	7.85	15.1	59.66	1.28	32.41	290.92	38.05	4.77	t3	40	38	22
mean		3.83	4.5	2.16	60.03	2.92	2.57	22.44	0.67	0.53	1.12	4.52	1.38	2.6	5.93	21.84	44.86	1.24	45.35	255.63	51.17	2.51		23	17	57
SD		0.197723	0.357699	0.401873	35.0219	0.639739	1.17686	5.17614	0.221669	0.221669	0.417394	1.03966	0.674856	0.382893	0.806762	11.8407	18.7725	0.252914	#REF!	112.594	38.1048	#REF!		5.97025	6.58367	11.8819
REG	B10P1	3.81	4.6	2.66	48.68	3.05	2.83	19.24	0.88	0.56	1.08	5.1	1.56	2.64	6.66	23.5	40.91	1.27	37.46	404.31	79.74	2.98	t2	32	30	38
REG	B10P2	3.75	4.3	1.84	56.93	3.53	4.47	18.18	0.89	0.73	1.22	5.1	1.77	2.99	6.87	25.71	40.8	1.23	39.02	174.86	47.92	2.71	t2	31	32	37
REG	B10P3	3.74	4.4	1.9	33.2	2.95	2.79	22.44	0.6	0.4	1.23	4.67	1.09	2.32	5.76	18.84	53.02	1.03	56.5	251.57	42.6	3	t2	29	28	43
REG	B10P4	3.67	4.5	2.1	44.55	2.79	4.2	22.44	0.85	0.59	1.79	7.96	1.55	3.34	9.51	16.34	53.59	1.46	22.3	227.34	62.83	4.85	t2	31	42	27
REG	B10P5	3.69	4.3	1.28	47.64	2.57	3.87	21.37	0.56	0.45	1.87	7.28	1.13	3	8.41	13.46	62.33	1.2	34.64	165.97	35.52	3.83	t2	29	37	34
REG	B10P6	3.57	4.3	1.88	56.93	3.86	4.27	21.37	1.1	0.67	1.31	7.87	1.92	3.23	9.79	19.57	40.56	1.46	33.72	464.33	82.84	4.83	t3	38	43	19
REG	B10P7	3.79	4.4	1.78	59	5.79	9.71	21.37	1.33	0.64	1.53	7.2	2.12	3.65	9.32	22.76	41.92	1.3	30.92	521.49	56.54	5.14	t3	40	38	22
REG	B10P8	3.81	4.4	1.92	30.1	3.43	3.56	16.05	0.75	0.43	1.18	5.05	1.26	2.44	6.31	19.92	48.36	1.03	43.75	368.57	50.12	3.87	t3	36	35	29
REG	B10P9	3.89	4.8	2.52	63.12	2.86	4.63	24.57	1.1	0.73	1.07	5.77	1.99	3.06	7.76	25.67	34.97	1.45	38.38	332.54	93.48	4.15	t3	39	33	28
REG	B11P1	3.88	4.8	2.34	59	2.82	2.82	22.44	1.17	0.83	1.08	5.58	2.15	3.23	7.73	27.83	33.44	1.59	40.53	208.22	47.95	3.34	t3	36	25	39
REG	B11P2	3.95	4.5	2.46	111.63	2.35	7.24	23.5	1.35	0.85	0.82	4.99	2.49	3.31	7.48	33.24	24.77	1.45	46.88	186.84	42.67	1.29	t2	25	11	64
REG	B11P3	4.48	5.6	2.46	143.62	2.26	2.33	22.44	2.41	1.13	0.15	2.83	3.91	4.06	6.74	57.99	3.69	1.44	55.96	76.68	135.04	0.69	t2	22	10	68
REG	B11P4	4.85	5.8	2.66	157.03	2.73	2.28	21.37	3.78	1.57	0.06	2.62	5.75	5.81	8.37	68.73	1.03	1.65	58.7	71.5	198.85	1.12	t2	30	14	56
REG	B11P5	4.64	6	2.88	125.04	2.14	2.38	22.44	3.32	1.35	0.09	2.77	4.99	5.08	7.76	64.31	1.77	2.13	41.43	53.47	174.75	0.87	t2	28	12	60
REG	B11P6	4.44	5.6	2.88	135.36	2.57	2.66	22.44	2.89	1.3	0.15	3.54	4.54	4.69	8.08	56.15	3.2	1.97	47.15	63.58	161.84	0.08	t2	30	14	56
REG	B11P7	3.81	5	2.7	85.83	2.57	2.67	23.5	1.34	0.78	0.64	5.9	2.34	2.98	8.24	28.4	21.48	1.89	41.88	177.48	74.59	0.88	t2	32	15	53
REG	B11P8	4.24	5.2	2.56	107.5	5.06	2.81	24.57	2.26	1.16	0.27	4.47	3.7	3.97	8.17	45.23	6.8	2.09	43.16	159.25	132.67	2.45	t2	30	18	52
REG	B11P9	4.46	5.4	3.18	121.95	2.23	2.7	22.44	2.9	1.44	0.19	2.9	4.65	4.84	7.55	61.63	3.93	1.38	43.28	53.56	101.09	1.05	t2	27	17	56
REG	B12P1	3.97	4.8	2.6	76.54	2.67	3.21	23.5	0.5	0.5	1.25	7.2	1.2	2.45	8.4	14.24	51.02	1.89	31.7	168.7	54.93	0.87	t2	32	15	53
REG	B12P2	3.99	4.7	2.62	49.71	2.79	2.43	19.24	0.46	0.39	0.84	5.22	0.98	1.82	6.2	15.77	46.15	1.45	41.2	109.03	88.21	0.46	t2	27	12	61
REG	B12P3	3.99	4.8	2.56	59	2.26	2.37	22.44	0.34	0.35	0.92	5.28	0.84	1.76	6.12	13.75	52.27	1.47	35.77	109.88	66.02	0.63	t2	24	10	66
REG	B12P4	3.9	4.7	2.4	56.93	2.29	2.17	21.37	0.46	0.5	0.92	5.9	1.11	2.03	7.01	15.78	45.32	1.66	39.99	78.98	48.42	0.42	t2	27	13	60
REG	B12P5	4.03	5	2.34	60.03	2.48	2.23	21.37	0.65	0.57	0.71	5.05	1.37	2.08	6.42	21.4	34.13	1.58	40.87	103.2	115.05	0.45	t2	24	10	66
REG	B12P6	3.75	4.5	2.26	44.55	2.14	2.21	19.24	0.38	0.37	1.15	5.34	0.86	2.01	6.2	13.94	57.21	1.81	37.36	83.4	58.01	0.28	t2	27	13	60
REG	B12P7	***	***	***	***	***	***	***	***	***	***	***	***	***	***	***	***	***	***	***	***	***	***	***	***	***
REG	B12P8	3.88	4.8	2.12	49.71	6.36	1.9	21.37	0.32	0.31	1.21	6.45	0.76	2.03	7.21	10.51	62.56	1.19	35.28	95.12	34.08	0.48	t2	21	18	61
REG	B12P9	3.75	4.6	2.1	78.6	3.3	1.86	22.44	0.54	0.44	0.77	5.34	1.18	1.95	6.52	18.12	39.49	1.62	42.34	143.72	79.66	0.57	t2	21	5	74
mean		3.885	4.75	2.43	59	2.76	2.745	22.44	0.885	0.615	0.995	5.25	1.665	2.995	7.515	22.08	40.68	1.46	40.7	162.61	70.305	1.085		29.5	16	54.5
SD		0.327127	0.48	0.418025	36.2023	1.09045	1.74456	3.69999	1.00447	0.369305	0.509165	1.51122	1.45157	1.0941	1.10215	17.9589	20.1015	0.299879	7.99445	130.59	44.8384	1.67039		5.25533	11.4706	15.755
	B12P7 the sample was damaged during shipping
