# Supplementary material
Source: MDPI journal article supplement (https://www.mdpi.com/2073-445X/10/8/768)
Supplement: s1 [file s1 › Korys_Supplementary_material_table_S3.xlsx]

## Sheet: SOM and SOC
identification	sample ID	SOM (dag kg-1)	Conversion into SOC (fator 0.58)	Conversion into dag to g
P1_active slope	B1 P1	1.87	1.0846	10.846
P1_active slope	B1 P2	2.44	1.4152	14.152
P1_active slope	B1 P3	2.27	1.3166	13.166
P1_active slope	B1 P4	2.52	1.4616	14.616
P1_active slope	B1 P5	2.09	1.2122	12.122
P1_active slope	B1 P6	1.92	1.1136	11.136
P1_active slope	B1 P7	2.26	1.3108	13.108
P1_active slope	B1 P8	1.97	1.1426	11.426
P1_active slope	B1P9	1.9	1.102	11.02
P1_active slope	B2 P1	1.83	1.0614	10.614
P1_active slope	B2 P2	1.56	0.9048	9.048
P1_active slope	B2 P3	2.13	1.2354	12.354
P1_active slope	B2 P4	1.96	1.1368	11.368
P1_active slope	B2 P5	1.76	1.0208	10.208
P1_active slope	B2 P6	1.94	1.1252	11.252
P1_active slope	B2 P7	1.73	1.0034	10.034
P1_active slope	B2P8	1.67	0.9686	9.686
P1_active slope	B2P9	1.84	1.0672	10.672
P1_active slope	B3P1	1.67	0.9686	9.686
P1_active slope	B3P2	1.28	0.7424	7.424
P1_active slope	B3P3	1.47	0.8526	8.526
P1_active slope	B3P4	1.77	1.0266	10.266
P1_active slope	B3P5	1.59	0.9222	9.222
P1_active slope	B3P6	1.47	0.8526	8.526
P1_active slope	B3P7	1.5	0.87	8.7
P1_active slope	B3P8	1.62	0.9396	9.396
P1_active slope	B3P9	1.36	0.7888	7.888
P2_active slope	B4P1	2.23	1.2934	12.934
P2_active slope	B4P2	1.88	1.0904	10.904
P2_active slope	B4P3	1.92	1.1136	11.136
P2_active slope	B4P4	1.86	1.0788	10.788
P2_active slope	B4P5	1.73	1.0034	10.034
P2_active slope	B4P6	1.86	1.0788	10.788
P2_active slope	B4P7	2.04	1.1832	11.832
P2_active slope	B4P8	2.03	1.1774	11.774
P2_active slope	B4P9	1.91	1.1078	11.078
P2_active slope	B5P1	1.68	0.9744	9.744
P2_active slope	B5P2	1.32	0.7656	7.656
P2_active slope	B5P3	1.59	0.9222	9.222
P2_active slope	B5P4	1.52	0.8816	8.816
P2_active slope	B5P5	1.77	1.0266	10.266
P2_active slope	B5P6	1.79	1.0382	10.382
P2_active slope	B5P7	1.79	1.0382	10.382
P2_active slope	B5P8	1.68	0.9744	9.744
P2_active slope	B5P9	1.48	0.8584	8.584
P2_active slope	B6P1	1.9	1.102	11.02
P2_active slope	B6P2	1.84	1.0672	10.672
P2_active slope	B6P3	1.69	0.9802	9.802
P2_active slope	B6P4	1.76	1.0208	10.208
P2_active slope	B6P5	1.4	0.812	8.12
P2_active slope	B6P6	1.42	0.8236	8.236
P2_active slope	B6P7	1.56	0.9048	9.048
P2_active slope	B6P8	1.19	0.6902	6.902
P2_active slope	B6P9	1.51	0.8758	8.758
P3_active_flat	B7P1	1.24	0.7192	7.192
P3_active_flat	B7P2	1.47	0.8526	8.526
P3_active_flat	B7P3	1.45	0.841	8.41
P3_active_flat	B7P4	1.14	0.6612	6.612
P3_active_flat	B7P5	1.22	0.7076	7.076
P3_active_flat	B7P6	1.48	0.8584	8.584
P3_active_flat	B7P7	1.52	0.8816	8.816
P3_active_flat	B7P8	1.23	0.7134	7.134
P3_active_flat	B7P9	1.24	0.7192	7.192
P3_active_flat	B8P1	1.07	0.6206	6.206
P3_active_flat	B8P2	1.51	0.8758	8.758
P3_active_flat	B8P3	1.81	1.0498	10.498
P3_active_flat	B8P4	1.64	0.9512	9.512
P3_active_flat	B8P5	1.47	0.8526	8.526
P3_active_flat	B8P6	1.2	0.696	6.96
P3_active_flat	B8P7	1.36	0.7888	7.888
P3_active_flat	B8P8	1.65	0.957	9.57
P3_active_flat	B8P9	1.46	0.8468	8.468
P3_active_flat	B9P1	0.93	0.5394	5.394
P3_active_flat	B9P2	0.97	0.5626	5.626
P3_active_flat	B9P3	1.4	0.812	8.12
P3_active_flat	B9P4	0.98	0.5684	5.684
P3_active_flat	B9P5	0.92	0.5336	5.336
P3_active_flat	B9P6	1.08	0.6264	6.264
P3_active_flat	B9P7	0.9	0.522	5.22
P3_active_flat	B9P8	0.95	0.551	5.51
P3_active_flat	B9P9	1.28	0.7424	7.424
REG	B10P1	1.27	0.7366	7.366
REG	B10P2	1.23	0.7134	7.134
REG	B10P3	1.03	0.5974	5.974
REG	B10P4	1.46	0.8468	8.468
REG	B10P5	1.2	0.696	6.96
REG	B10P6	1.46	0.8468	8.468
REG	B10P7	1.3	0.754	7.54
REG	B10P8	1.03	0.5974	5.974
REG	B10P9	1.45	0.841	8.41
REG	B11P1	1.59	0.9222	9.222
REG	B11P2	1.45	0.841	8.41
REG	B11P3	1.44	0.8352	8.352
REG	B11P4	1.65	0.957	9.57
REG	B11P5	2.13	1.2354	12.354
REG	B11P6	1.97	1.1426	11.426
REG	B11P7	1.89	1.0962	10.962
REG	B11P8	2.09	1.2122	12.122
REG	B11P9	1.38	0.8004	8.004
REG	B12P1	1.89	1.0962	10.962
REG	B12P2	1.45	0.841	8.41
REG	B12P3	1.47	0.8526	8.526
REG	B12P4	1.66	0.9628	9.628
REG	B12P5	1.58	0.9164	9.164
REG	B12P6	1.81	1.0498	10.498
REG	B12P7
REG	B12P8	1.19	0.6902	6.902
REG	B12P9	1.62	0.9396	9.396
CONTROL*	P1	0.91	0.5278	5.278
CONTROL	P2	1.69	0.9802	9.802
CONTROL	P3	1.51	0.8758	8.758
CONTROL	P4	1.84	1.0672	10.672
CONTROL	P5	2.15	1.247	12.47
CONTROL	P6	1.68	0.9744	9.744
CONTROL	P7	2.86	1.6588	16.588
CONTROL	P8	1.89	1.0962	10.962
CONTROL	P9	1.67	0.9686	9.686
CONTROL	P10	1.55	0.899	8.99
B12P7 the sample was damaged during shipping
* CONTROL = reference system (degraded pasture)

## Sheet: N
identification	sample ID	N (g/kg)
P1_active slope	B1 P1	2.16
P1_active slope	B1 P2	3.22
P1_active slope	B1 P3	2.2
P1_active slope	B1 P4	2.88
P1_active slope	B1 P5	2.04
P1_active slope	B1 P6	2.38
P1_active slope	B1 P7	2.66
P1_active slope	B1 P8	2.66
P1_active slope	B1P9	4.9
P1_active slope	B2 P1	2.02
P1_active slope	B2 P2	2.26
P1_active slope	B2 P3	2.1
P1_active slope	B2 P4	2.3
P1_active slope	B2 P5	2.36
P1_active slope	B2 P6	2.18
P1_active slope	B2 P7	2.34
P1_active slope	B2P8	2.22
P1_active slope	B2P9	2.36
P1_active slope	B3P1	2.12
P1_active slope	B3P2	1.54
P1_active slope	B3P3	2.08
P1_active slope	B3P4	2.48
P1_active slope	B3P5	2.02
P1_active slope	B3P6	2.3
P1_active slope	B3P7	2.04
P1_active slope	B3P8	2.1
P1_active slope	B3P9	2.1
mean		2.22
sd		0.596
P2_active slope	B4P1	2.24
P2_active slope	B4P2	2.24
P2_active slope	B4P3	2.4
P2_active slope	B4P4	2.14
P2_active slope	B4P5	2.16
P2_active slope	B4P6	2.24
P2_active slope	B4P7	2.3
P2_active slope	B4P8	2.26
P2_active slope	B4P9	2.08
P2_active slope	B5P1	2.24
P2_active slope	B5P2	2.4
P2_active slope	B5P3	2.24
P2_active slope	B5P4	2.04
P2_active slope	B5P5	2.2
P2_active slope	B5P6	2.16
P2_active slope	B5P7	2.54
P2_active slope	B5P8	2.38
P2_active slope	B5P9	2.26
P2_active slope	B6P1	2.58
P2_active slope	B6P2	2.5
P2_active slope	B6P3	2.88
P2_active slope	B6P4	2.44
P2_active slope	B6P5	2.46
P2_active slope	B6P6	2.24
P2_active slope	B6P7	2.56
P2_active slope	B6P8	2.16
P2_active slope	B6P9	2.24
mean		2.24
sd		0.184168
P3_active_flat	B7P1	2.22
P3_active_flat	B7P2	2.32
P3_active_flat	B7P3	2.36
P3_active_flat	B7P4	2.44
P3_active_flat	B7P5	2.34
P3_active_flat	B7P6	2.52
P3_active_flat	B7P7	2.58
P3_active_flat	B7P8	2.02
P3_active_flat	B7P9	2.38
P3_active_flat	B8P1	1.62
P3_active_flat	B8P2	2.22
P3_active_flat	B8P3	2.16
P3_active_flat	B8P4	2.64
P3_active_flat	B8P5	1.56
P3_active_flat	B8P6	1.28
P3_active_flat	B8P7	1.52
P3_active_flat	B8P8	1.9
P3_active_flat	B8P9	2.6
P3_active_flat	B9P1	1.48
P3_active_flat	B9P2	1.46
P3_active_flat	B9P3	2.2
P3_active_flat	B9P4	1.64
P3_active_flat	B9P5	1.62
P3_active_flat	B9P6	1.86
P3_active_flat	B9P7	1.92
P3_active_flat	B9P8	1.88
P3_active_flat	B9P9	2.18
mean		2.16
SD		0.401873
REG	B10P1	2.66
REG	B10P2	1.84
REG	B10P3	1.9
REG	B10P4	2.1
REG	B10P5	1.28
REG	B10P6	1.88
REG	B10P7	1.78
REG	B10P8	1.92
REG	B10P9	2.52
REG	B11P1	2.34
REG	B11P2	2.46
REG	B11P3	2.46
REG	B11P4	2.66
REG	B11P5	2.88
REG	B11P6	2.88
REG	B11P7	2.7
REG	B11P8	2.56
REG	B11P9	3.18
REG	B12P1	2.6
REG	B12P2	2.62
REG	B12P3	2.56
REG	B12P4	2.4
REG	B12P5	2.34
REG	B12P6	2.26
REG	B12P7 *
REG	B12P8	2.12
REG	B12P9	2.1
mean		2.43
SD		0.418025
CONTROL*	P1	1.1
CONTROL	P2	2.1
CONTROL	P3	2.3
CONTROL	P4	2.14
CONTROL	P5	2.32
CONTROL	P6	2.14
CONTROL	P7	2.48
CONTROL	P8	2.2
CONTROL	P9	2.06
CONTROL	P10	1.94
mean		2.14
SD		0.375405
B12P7 the sample was damaged during shipping
* CONTROL = reference system (degraded pasture)

## Sheet: CN ratio
identification	sample ID	SOC (g kg -1)	N (g kg -1)	C:N
P1_active slope	B1 P1	10.846	2.16	5.0213
P1_active slope	B1 P2	14.152	3.22	4.39503
P1_active slope	B1 P3	13.166	2.2	5.98455
P1_active slope	B1 P4	14.616	2.88	5.075
P1_active slope	B1 P5	12.122	2.04	5.94216
P1_active slope	B1 P6	11.136	2.38	4.67899
P1_active slope	B1 P7	13.108	2.66	4.92782
P1_active slope	B1 P8	11.426	2.66	4.29549
P1_active slope	B1P9	11.02	4.9	2.24898
P1_active slope	B2 P1	10.614	2.02	5.25446
P1_active slope	B2 P2	9.048	2.26	4.00354
P1_active slope	B2 P3	12.354	2.1	5.88286
P1_active slope	B2 P4	11.368	2.3	4.94261
P1_active slope	B2 P5	10.208	2.36	4.32542
P1_active slope	B2 P6	11.252	2.18	5.16147
P1_active slope	B2 P7	10.034	2.34	4.28803
P1_active slope	B2P8	9.686	2.22	4.36306
P1_active slope	B2P9	10.672	2.36	4.52203
P1_active slope	B3P1	9.686	2.12	4.56887
P1_active slope	B3P2	7.424	1.54	4.82078
P1_active slope	B3P3	8.526	2.08	4.09904
P1_active slope	B3P4	10.266	2.48	4.13952
P1_active slope	B3P5	9.222	2.02	4.56535
P1_active slope	B3P6	8.526	2.3	3.70696
P1_active slope	B3P7	8.7	2.04	4.26471
P1_active slope	B3P8	9.396	2.1	4.47429
P1_active slope	B3P9	7.888	2.1	3.75619
mean		10.614	2.22	4.52203
sd		1.82825	0.595995	0.763023
P2_active slope	B4P1	12.934	2.24	5.77411
P2_active slope	B4P2	10.904	2.24	4.86786
P2_active slope	B4P3	11.136	2.4	4.64
P2_active slope	B4P4	10.788	2.14	5.04112
P2_active slope	B4P5	10.034	2.16	4.64537
P2_active slope	B4P6	10.788	2.24	4.81607
P2_active slope	B4P7	11.832	2.3	5.14435
P2_active slope	B4P8	11.774	2.26	5.20973
P2_active slope	B4P9	11.078	2.08	5.32596
P2_active slope	B5P1	9.744	2.24	4.35
P2_active slope	B5P2	7.656	2.4	3.19
P2_active slope	B5P3	9.222	2.24	4.11696
P2_active slope	B5P4	8.816	2.04	4.32157
P2_active slope	B5P5	10.266	2.2	4.66636
P2_active slope	B5P6	10.382	2.16	4.80648
P2_active slope	B5P7	10.382	2.54	4.0874
P2_active slope	B5P8	9.744	2.38	4.09412
P2_active slope	B5P9	8.584	2.26	3.79823
P2_active slope	B6P1	11.02	2.58	4.27132
P2_active slope	B6P2	10.672	2.5	4.2688
P2_active slope	B6P3	9.802	2.88	3.40347
P2_active slope	B6P4	10.208	2.44	4.18361
P2_active slope	B6P5	8.12	2.46	3.30081
P2_active slope	B6P6	8.236	2.24	3.67679
P2_active slope	B6P7	9.048	2.56	3.53437
P2_active slope	B6P8	6.902	2.16	3.19537
P2_active slope	B6P9	8.758	2.24	3.90982
mean		10.208	2.24	4.27132
SD		1.38454	0.184168	0.687566
P3_active_flat	B7P1	7.192	2.22	3.23964
P3_active_flat	B7P2	8.526	2.32	3.675
P3_active_flat	B7P3	8.41	2.36	3.56356
P3_active_flat	B7P4	6.612	2.44	2.70984
P3_active_flat	B7P5	7.076	2.34	3.02393
P3_active_flat	B7P6	8.584	2.52	3.40635
P3_active_flat	B7P7	8.816	2.58	3.41705
P3_active_flat	B7P8	7.134	2.02	3.53168
P3_active_flat	B7P9	7.192	2.38	3.02185
P3_active_flat	B8P1	6.206	1.62	3.83086
P3_active_flat	B8P2	8.758	2.22	3.94505
P3_active_flat	B8P3	10.498	2.16	4.86019
P3_active_flat	B8P4	9.512	2.64	3.60303
P3_active_flat	B8P5	8.526	1.56	5.46538
P3_active_flat	B8P6	6.96	1.28	5.4375
P3_active_flat	B8P7	7.888	1.52	5.18947
P3_active_flat	B8P8	9.57	1.9	5.03684
P3_active_flat	B8P9	8.468	2.6	3.25692
P3_active_flat	B9P1	5.394	1.48	3.64459
P3_active_flat	B9P2	5.626	1.46	3.85342
P3_active_flat	B9P3	8.12	2.2	3.69091
P3_active_flat	B9P4	5.684	1.64	3.46585
P3_active_flat	B9P5	5.336	1.62	3.29383
P3_active_flat	B9P6	6.264	1.86	3.36774
P3_active_flat	B9P7	5.22	1.92	2.71875
P3_active_flat	B9P8	5.51	1.88	2.93085
P3_active_flat	B9P9	7.424	2.18	3.4055
mean		7.192	2.16	3.53168
SD		1.4669	0.401873	0.786274
REG	B10P1	7.366	2.66	2.76917
REG	B10P2	7.134	1.84	3.87717
REG	B10P3	5.974	1.9	3.14421
REG	B10P4	8.468	2.1	4.03238
REG	B10P5	6.96	1.28	5.4375
REG	B10P6	8.468	1.88	4.50426
REG	B10P7	7.54	1.78	4.23596
REG	B10P8	5.974	1.92	3.11146
REG	B10P9	8.41	2.52	3.3373
REG	B11P1	9.222	2.34	3.94103
REG	B11P2	8.41	2.46	3.4187
REG	B11P3	8.352	2.46	3.39512
REG	B11P4	9.57	2.66	3.59774
REG	B11P5	12.354	2.88	4.28958
REG	B11P6	11.426	2.88	3.96736
REG	B11P7	10.962	2.7	4.06
REG	B11P8	12.122	2.56	4.73516
REG	B11P9	8.004	3.18	2.51698
REG	B12P1	10.962	2.6	4.21615
REG	B12P2	8.41	2.62	3.20992
REG	B12P3	8.526	2.56	3.33047
REG	B12P4	9.628	2.4	4.01167
REG	B12P5	9.164	2.34	3.91624
REG	B12P6	10.498	2.26	4.64513
REG	B12P7
REG	B12P8	6.902	2.12	3.25566
REG	B12P9	9.396	2.1	4.47429
mean		8.468	2.43	3.92863
SD		1.7393	0.418025	0.665864
CONTROL*	P1	5.278	1.1	4.79818
CONTROL	P2	9.802	2.1	4.66762
CONTROL	P3	8.758	2.3	3.80783
CONTROL	P4	10.672	2.14	4.98692
CONTROL	P5	12.47	2.32	5.375
CONTROL	P6	9.744	2.14	4.55327
CONTROL	P7	16.588	2.48	6.68871
CONTROL	P8	10.962	2.2	4.98273
CONTROL	P9	9.686	2.06	4.70194
CONTROL	P10	8.99	1.94	4.63402
mean		9.773	2.14	4.75006
SD		2.88815	0.375405	0.739599
B12P7 the sample was damaged during shipping
* CONTROL = reference system (degraded pasture)

## Sheet: TABLE
Treatments	SOC (g kg-1)	N (g kg-1)	C:N
P1	10.61	2.22	4.52 ± 0.76
P2	10.21	2.24	4.27 ± 0.69
P3	7.19	2.16	3.53 ± 0.78
REG	8.46	2.43	3.92 ± 0.66
CONTROL	9.77	2.14	4.75 ± 0.73
