# Supplementary material
Source: MDPI journal article supplement (https://www.mdpi.com/2073-445X/10/8/768)
Supplement: s1 [file s1 › Korys_Supplementary_material_table_S4.xlsx]

## Sheet: P1
Supplementary material Table S4. List of plant species from restored areas P1,P2,P3 and REG
List of species from area "P1": active planting/slope
Bombacopsis glabra (Pasq.) A.Robyns
Piptadenia gonoacantha (Mart.) J.F.Macbr.
Aegiphila integrifolia (Jacq.) Moldenke
Anadenanthera macrocarpa (Benth.) Brenan
Astronium graveolens Jacq.
Aureliana fasciculata (Vell.) Sendtn.
Casearia sylvestris Sw.
Cecropia pachystachya Trécul
Cedrela fissilis Vell.
Ceiba speciosa (A.St.-Hil.) Ravenna
Citharexylum myrianthum Cham.
Cordia myxa L.
Cordia superba Cham.
Cordia trichotoma (Vell.) Arráb. Ex Steud.
Dalbergia frutescens (Vell.) Britton
Fabaceae sp.
Gochnatia polymorpha (Less.) Cabrera
Guarea guidonia (L.) Sleumer
Handroanthus chrysotrichus (Mart. ex DC.) Mattos
Handroanthus impetiginosus (Mart. ex DC.) Mattos
Inga laurina (Sw.) Willd.
Jatropha sp.
Lauraceae sp1
Machaerium nyctitans (Vell.) Benth.
Plathymenia foliolosa Benth.
Psidium guajava L.
Schinus terebinthifolius Raddi
Senegalia polyphylla (DC.) Britton & Rose
Senna pendula H.S.Irwin & Barneby
Siparuna guianensis Aublet
Solanum swartzianum Roem. & Schult.
Sparattosperma leucanthum (Vell.) K.Schum.
Tetrorchidium rubrivenium Poepp.
Tibouchina granulosa (Desr.) Cogn.
Trema micrantha (L.) Blume
Triplaris americana L.
Vernonanthura discolor (Spreng.) H.Rob.

## Sheet: P2
List of species from area "P2": active planting/slope
Baccharis semiserrata DC.
Bombacopsis glabra (Pasq.) A.Robyns
Plathymenia foliolosa Benth.
Aegiphila integrifolia (Jacq.) Moldenke
Caesalpinia leiostachya (Benth.) Ducke
Cecropia glaziovii Sneth.
Ceiba speciosa (A.St.-Hil.) Ravenna
Centrolobium robustum (Vell.) Mart. ex Benth.
Citharexylum myrianthum Cham.
Cordia trichotoma (Vell.) Arráb. Ex Steud.
Dalbergia nigra (Vell.) Allemão ex Benth.
Handroanthus chrysotrichus (Mart. ex DC.) Mattos
Inga laurina (S W.) Willd
Joanesia princeps Vell.
Machaerium nyctitans (Vell.) Benth.
Mimosa bimucronata (DC.) Kuntze
Peltophorum dubium (Spreng.) Taub.
Piptadenia gonoacantha (Mart.) J.F.Macbr.
Piptadenia paniculata Benth.
Psidium guajava L.
Rapanea ferruginea (Ruiz & Pav.) Mez
Schinus terebinthifolius Raddi
Schizolobium parahyba (Vell.) Blake
Senna macranthera H.S.Irwin & Barneby
Senna multijuga (Rich.) H.S. Irwin & Barneby.
Solanum mauritianum Scop.
Tibouchina granulosa (Desr.) Cogn.
Vernonanthura discolor (Spreng.) H.Rob.
Handroanthus impetiginosus (Mart. ex DC.) Mattos

## Sheet: P3
List of species from area "P3": active planting: flat
Alchornea glandulosa Poepp. & Endl.
Bombacopsis glabra (Pasq.) A.Robyns
Cybistax antisyphilitica (Mart.) Mart.
Plathymenia foliolosa Benth.
Aegiphila integrifolia (Jacq.) Moldenke
Aureliana fasciculata (Vell.) Sendtn.
Calophyllum brasiliense Cambess.
Cecropia glaziovii Sneth.
Cecropia pachystachya Trécul
Centrolobium robustum (Vell.) Mart. ex Benth.
Citharexylum myrianthum Cham.
Genipa americana L.
Gochnatia polymorpha (Less.) Cabrera
Guarea guidonia (L.) Sleumer
Handroanthus chrysotrichus (Mart. ex DC.) Mattos
Inga edulis Mart.
Inga laurina (Sw.) Willd.
Lauraceae sp1
Lecythis lanceolata Poir.
Machaerium nyctitans (Vell.) Benth.
Mimosa bimucronata (DC.) Kuntze
Peltophorum dubium (Spreng.) Taub.
Piptadenia gonoacantha (Mart.) J.F.Macbr.
Pseudobombax grandiflorum (Cav.) A.Robyns
Psidium guajava L.
Rapanea ferruginea (Ruiz & Pav.) Mez
Schinus terebinthifolius Raddi
Solanum swartzianum Roem. & Schult.
Sparattosperma leucanthum (Vell.) K.Schum.
Tetrorchidium rubrivenium Poepp.
Tibouchina granulosa (Desr.) Cogn.
Trema micrantha (L.) Blume
Xylopia sericea A.St.-Hil.
Handroanthus impetiginosus (Mart. ex DC.) Mattos

## Sheet: REG
List of species from area where natural regeneration "REG" occured
Cupania oblongifolia Mart.
Aegiphila integrifolia (Jacq.) Moldenke
Anonaceae sp1
Aureliana fasciculata (Vell.) Sendtn.
Bauhinia forficata Link.
Casearia sylvestris Sw.
Cecropia pachystachya Trécul
Citharexylum myrianthum Cham.
Ficus insipida Willd.
Gochnatia polymorpha (Less.) Cabrera
Guarea guidonia (L.) Sleumer
Handroanthus chrysotrichus (Mart. ex DC.) Mattos
Inga laurina (Sw.) Willd.
Machaerium nyctitans (Vell.) Benth.
Mimosa bimucronata (DC.) Kuntze
Nectandra puberula (Schott) Nees
Peltophorum dubium (Spreng.) Taub.
Plathymenia foliolosa Benth.
Psidium guajava L.
Rapanea ferruginea (Ruiz & Pav.) Mez
Siparuna guianensis Aublet
Solanum swartzianum Roem. & Schult.
Sparattosperma leucanthum (Vell.) K.Schum.
Trema micrantha (L.) Blume
